# Supplementary material for: Activity and Stability of Panx1 Channels in Astrocytes and Neuroblastoma Cells Are Enhanced by Cholesterol Depletion
Source: MDPI journal article supplement (doi:10.3390/cells11203219), 2022-10-14
Supplement: s1 [file s1]

SUPPLEMENTAL INFORMATION:

# **Activity and Stability of Panx1 Channels in Astrocytes and Neuroblastoma Cells Are Enhanced by Cholesterol Depletion**

**Antonio Cibelli <sup>1,\*†</sup>, Eliana Scemes <sup>2</sup> and David C. Spray <sup>1</sup>**

<sup>1</sup> Department of Neuroscience, Albert Einstein College of Medicine, Bronx, NY 10461, USA

<sup>2</sup> Department of Cell Biology and Anatomy, NY Medical College, Valhalla, NY10595, USA

\* Correspondence: antonio.cibelli@uniba.it;

† Present Address: Department of Biosciences, Biotechnologies and Biopharmaceutics, University of Bari Aldo Moro, Via Orabona 4, 70125 Bari, Italy; Tel. +39-0805443335

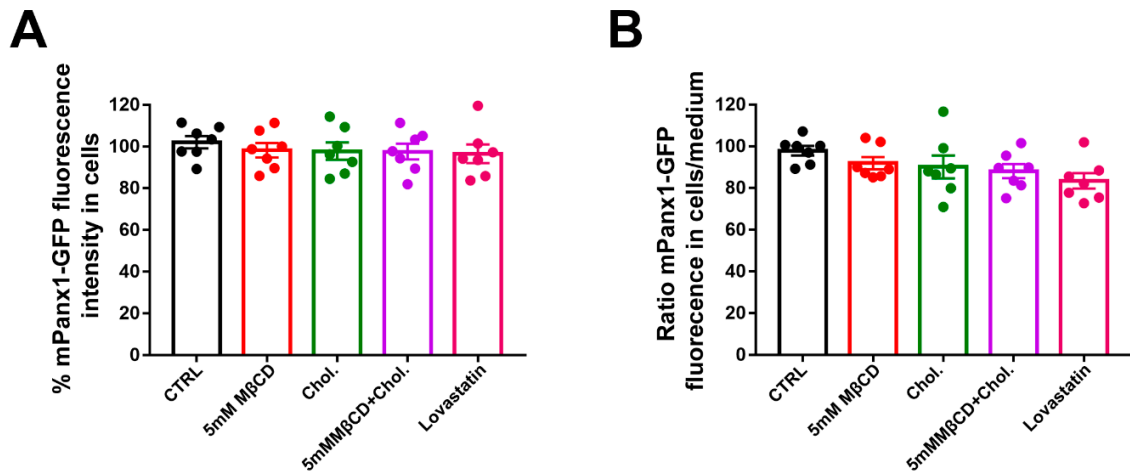

**Supplemental Figure S1.** Effects of treatment with MβCD and lovastatin on mPanx-1-GFP expression.

mPanx-1-GFP transfected N2a cells were incubated with cyclodextrin (5 mM MβCD for 60 min at 37°C), lovastatin (5 μM, 12 hr) in serum-free DMEM, cholesterol (2h, 37°C) or left untreated (CTRL). (A) Histograms showing mPanx-1-GFP fluorescence intensity in cells expressed as a percentage relative to that of untreated cells (CTRL), considered as 100 %. Note that treatments did not effect mPanx1-GFP expression intensity in cells. Each point on the graphs represents relative mPanx1-GFP fluorescence changes recorded from all cells present in a field of view obtained from at 3 independent experiments. (B) Ratios of fluorescence intensity of mPanx-1-GFP in cells to medium. Note that the ratios of intensity are similar. ANOVA test followed by Dunnett's test.

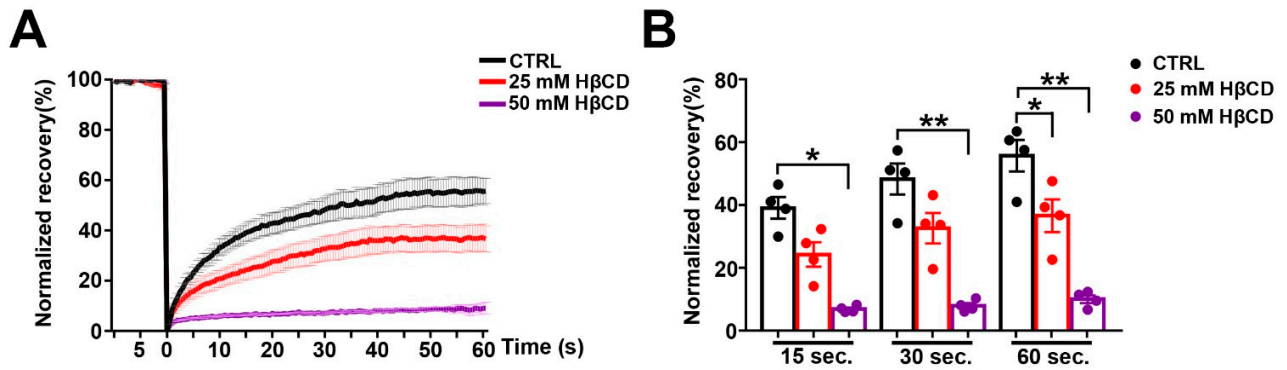

**Supplemental Figure S2.** Effects of 2-Hydroxypropyl- $\beta$ -cyclodextrin on the lateral diffusion of mPanx-1-GFP. N2a cells transiently expressing mPanx-1-GFP were subjected to treatments with 25 mM and 50 mM of 2-Hydroxypropyl- $\beta$ -cyclodextrin (H $\beta$ CD) or left untreated (CTRL). FRAP experiments were conducted on live cells at 30°C. (A) FRAP recovery curves for control cells and with 25 mM and 50 mM of H $\beta$ CD. (B) Histograms of normalized FRAP recovery at 15, 30 and 60 sec after photobleach.  $n=7-10$  per plasma membrane domain, data collected over three independent repeats. P values obtained from ANOVA test followed by Dunnett's test. (\*:  $p<.05$ ; \*\*:  $p<.01$ ).
